# Supplementary material for: Broadband electron paramagnetic resonance of a molecular spin triangle
Source: Royal Society of Chemistry journal article supplement (doi:10.1039/d1cp03295j), 2021-01-01
Supplement: d1cp03295j1.pdf [file d1cp03295j1.pdf]

## Supporting Information

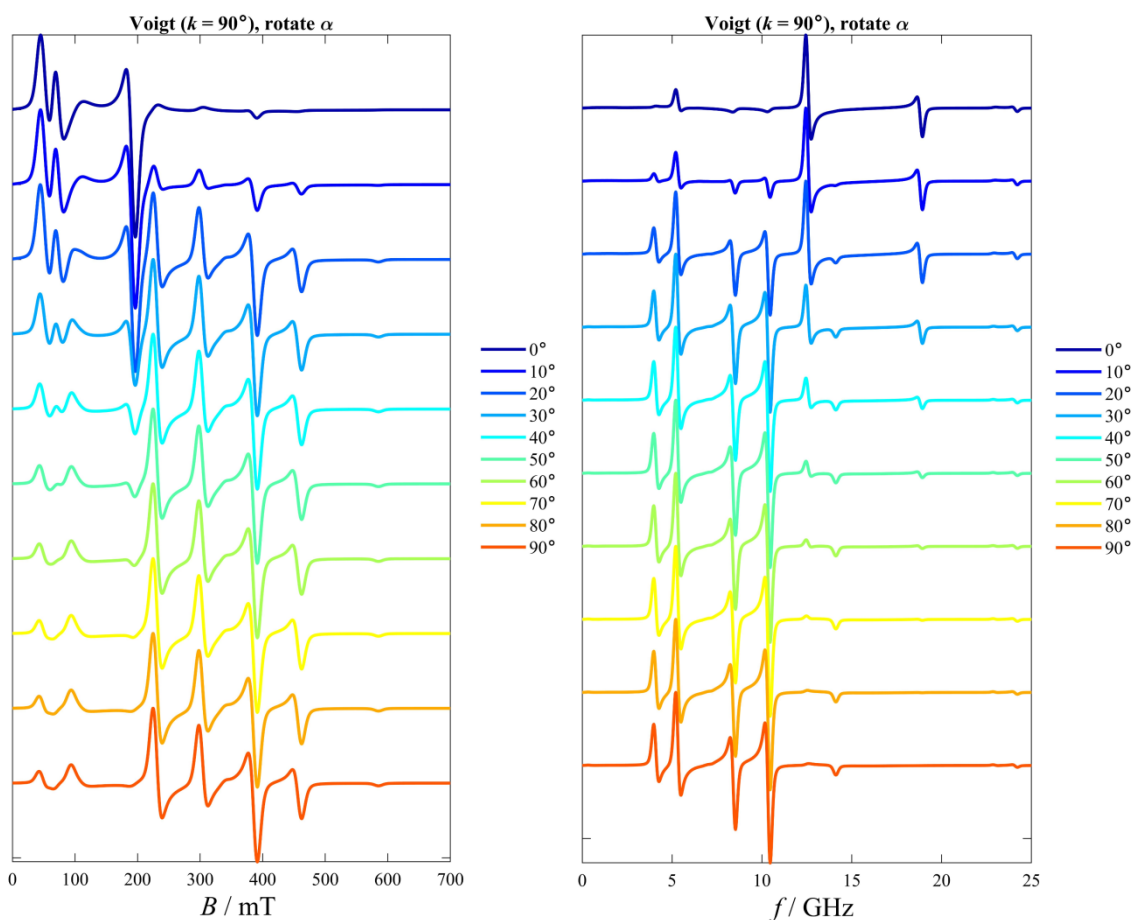

**Figure S1.** Spectral simulations for different microwave polarization angles in the Voigt configuration. For  $\alpha = 0$  we obtain the analogue of parallel-mode spectra ( $\mathbf{B}_1 \parallel \mathbf{B}_0$ ) and for  $\alpha = 90^\circ$  we obtain the analogue of perpendicular-mode spectra ( $\mathbf{B}_1 \perp \mathbf{B}_0$ ). For field-swept spectra  $f = 9.514$  GHz, and for frequency-swept spectra  $B_0 = 258$  mT.

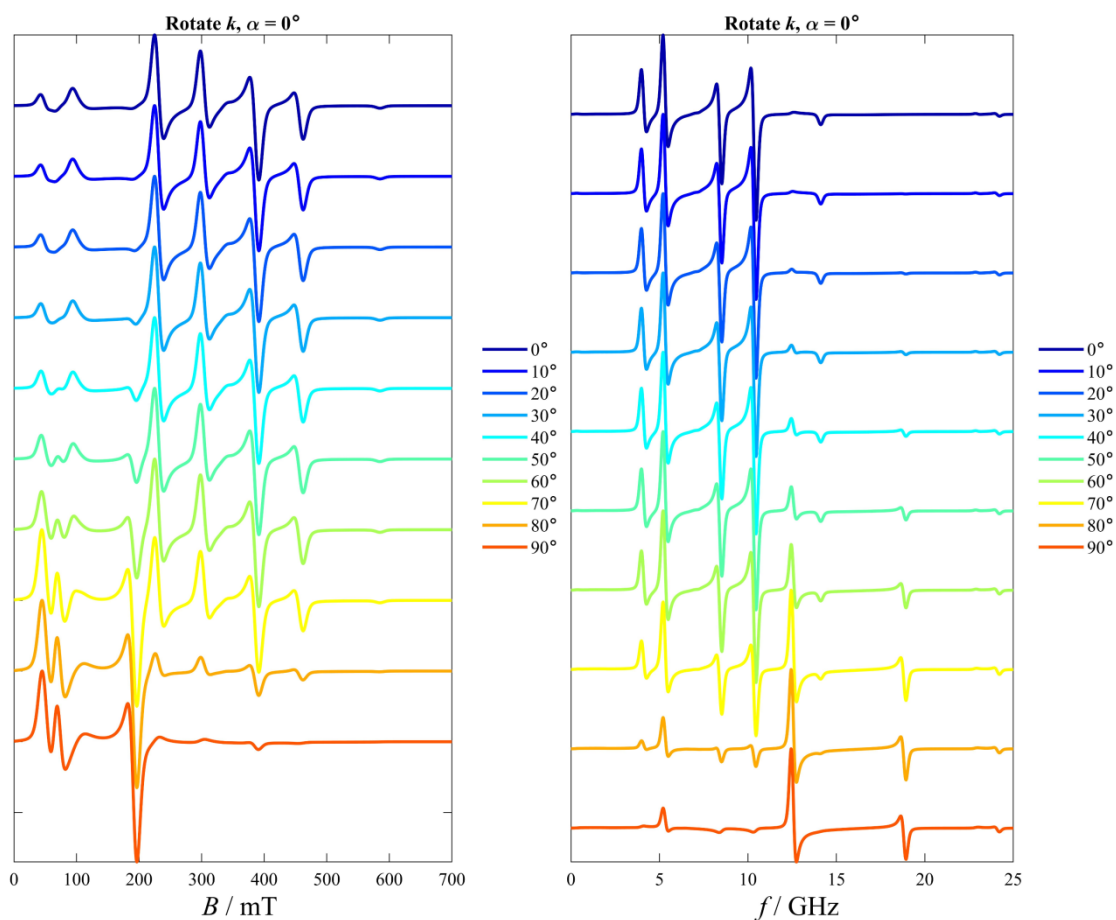

**Figure S2.** Spectral simulations for different orientations of the  $k$ -vector relative to the Zeeman field between  $0$  (Faraday) and  $90^\circ$  (Voigt). For the  $\alpha = 0$  angle shown, the rotation corresponds to a transition from perpendicular- to parallel-mode EPR. For an angle  $\alpha = 90^\circ$  (not shown) all  $k$ -vector orientations correspond to perpendicular-mode EPR and no spectral changes are predicted. The microwave frequency and magnetic field for the two simulated experiments are as in the figure above.

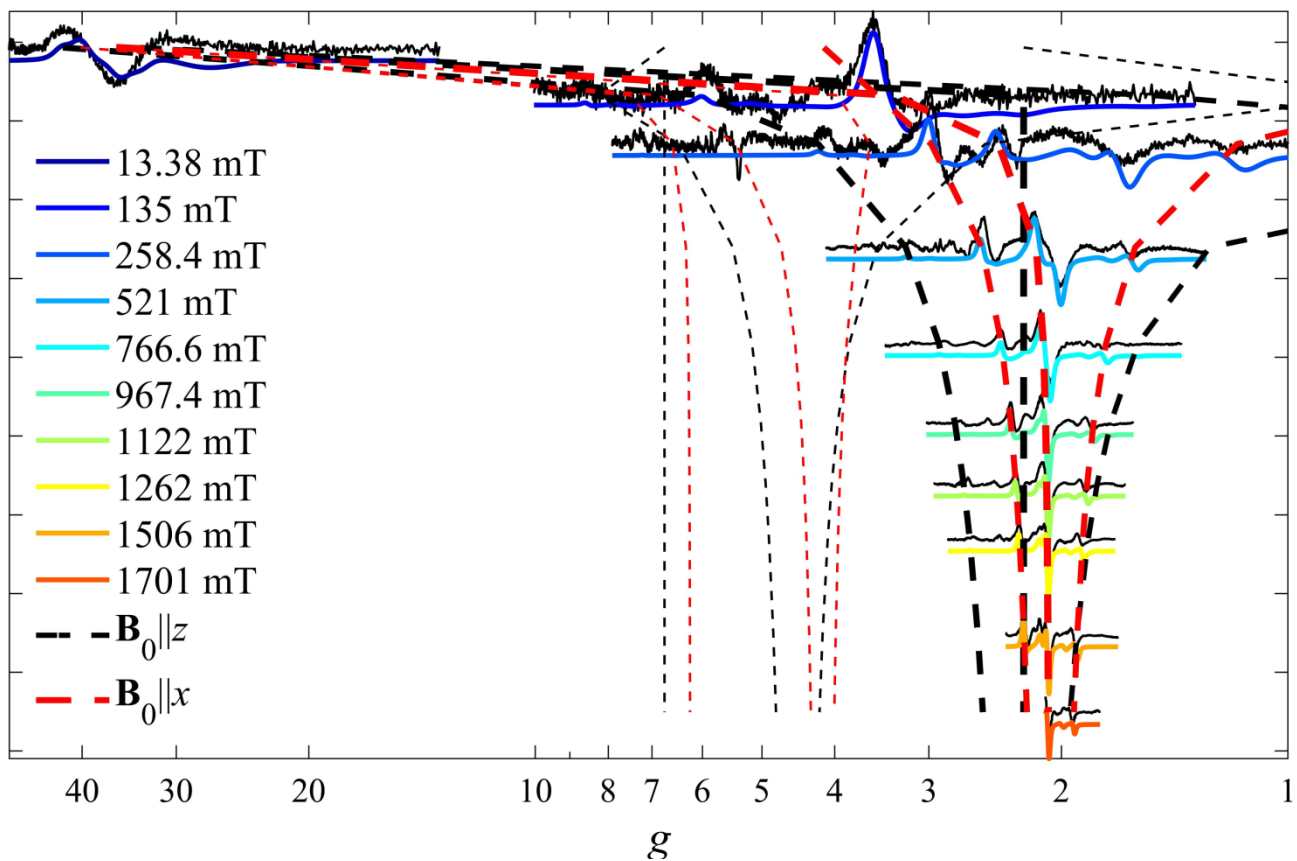

**Figure S3.** Field-swept spectra of Figure 7 plotted in a  $g$ -scale. The  $g$ -axis is logarithmic to better illustrate the 13 mT spectrum which spans the  $g = 14$ -64 region. For visual agreement with field-swept spectra, the phases of the spectra have been rotated by  $\pi$ , i.e. they have been flipped on the  $y$ -scale.
